# Supplementary material for: Concomitant medication, comorbidity and survival in patients with breast cancer
Source: PubMed Central journal article supplement (PMC10997660; doi:10.1038/s41467-024-47002-3), 2024-04-05
Supplement: 41467_2024_47002_MOESM1_ESM.pdf [file 41467_2024_47002_MOESM1_ESM.pdf]

# Concomitant medication, comorbidity and survival in patients with breast cancer

## Supplementary Information

|    |                                                                                                                                                 |           |
|----|-------------------------------------------------------------------------------------------------------------------------------------------------|-----------|
| 2  | <b>Supplementary Methods</b> .....                                                                                                              | <b>3</b>  |
| 3  | <i>Data source and study population</i> .....                                                                                                   | 3         |
| 4  | <i>Concomitant medication</i> .....                                                                                                             | 3         |
| 5  | <i>Comorbid conditions</i> .....                                                                                                                | 5         |
| 6  | <i>Other covariates</i> .....                                                                                                                   | 6         |
| 7  | Pre-exposure covariates .....                                                                                                                   | 6         |
| 8  | Post-exposure covariates.....                                                                                                                   | 9         |
| 9  | <i>Causal inference pipeline and methods used</i> .....                                                                                         | 9         |
| 10 | Step 1: Adjustment by inverse probability of treatment weighting (IPTW).....                                                                    | 10        |
| 11 | Step 2: Adjustment quality check .....                                                                                                          | 11        |
| 12 | Step 3: Average treatment effect estimation .....                                                                                               | 12        |
| 13 | Step 4: Mediation analyses.....                                                                                                                 | 12        |
| 14 | Step 5: Kaplan-Meier survival curves.....                                                                                                       | 15        |
| 15 | <i>Software</i> .....                                                                                                                           | 15        |
| 16 | <b>Supplementary Tables</b> .....                                                                                                               | <b>17</b> |
| 17 | Supplementary Table 1: Results of sensitivity analyses. ....                                                                                    | 17        |
| 18 | Supplementary Table 2: List of ATC classes discarded from the analyses. ....                                                                    | 19        |
| 19 | Supplementary Table 3: Medication presentation according to the medication packaging form. ....                                                 | 20        |
| 20 | <b>Supplementary Figures</b> .....                                                                                                              | <b>22</b> |
| 21 | Supplementary Figure 1: Frequency and number of comorbid conditions for the total population, by                                                |           |
| 22 | deprivation index and by age at BC diagnosis.....                                                                                               | 22        |
| 23 | Supplementary Figure 2: Association between comorbid conditions (at disease level). ....                                                        | 24        |
| 24 | Supplementary Figure 3: Screenshot of the web page for visualizing the associations between comorbid                                            |           |
| 25 | conditions within the ADRENALINE application                                                                                                    |           |
| 26 | ( <a href="https://adrenaline.curie.fr/static/network_comor/index.html">https://adrenaline.curie.fr/static/network_comor/index.html</a> ). .... | 25        |

|    |                                                                                                                                    |           |
|----|------------------------------------------------------------------------------------------------------------------------------------|-----------|
| 27 | Supplementary Figure 4: Association between medications (at ATC level 2) and comorbid conditions (at                               |           |
| 28 | category level). .....                                                                                                             | 26        |
| 29 | Supplementary Figure 5: Frequency and number of medications used at the time of BC diagnosis, for the                              |           |
| 30 | total population, by deprivation index and by age at BC diagnosis. ....                                                            | 28        |
| 31 | Supplementary Figure 6: Association between medications (at ATC level 2). ....                                                     | 30        |
| 32 | Supplementary Figure 7: Screenshot of the web page for visualizing associations between medications at                             |           |
| 33 | ATC level 5 within the ADRENALINE web application                                                                                  |           |
| 34 | ( <a href="https://adrenaline.curie.fr/static/network/index.html">https://adrenaline.curie.fr/static/network/index.html</a> )..... | 31        |
| 35 | Supplementary Figure 8: Association between the number of comorbid conditions and the number of                                    |           |
| 36 | medications. ....                                                                                                                  | 32        |
| 37 | Supplementary Figure 9: Simplified flowchart of the French Early Breast Cancer Cohort.....                                         | 33        |
| 38 | Supplementary Figure 10: Modified ATC codes and ATC names for ATC class G03 (sex hormones and                                      |           |
| 39 | modulators of the genital system). ....                                                                                            | 34        |
| 40 | Supplementary Figure 11: Directed acyclic graph (DAG).....                                                                         | 35        |
| 41 | Supplementary Figure 12: Directed acyclic graph (DAG) for the mediation analyses. ....                                             | 37        |
| 42 | <b>Supplementary References .....</b>                                                                                              | <b>39</b> |

## 43 Supplementary Methods

### 44 Data source and study population

45

46 Demographic data, hospital discharge reports and outpatient care data were available for the  
47 year preceding patient inclusion, up to December 31, 2018. Data for the patients' history of  
48 long-term illness (LTI) were available until December 31, 2018.

49 The diagnosis codes were recorded in the SNDS, based on the International Classification of  
50 Diseases – 10<sup>th</sup> revision, ICD-10<sup>1</sup>. Procedures were recorded with the CCAM classification  
51 (Classification Communes des Actes Médicaux). Medications prescribed in outpatient care  
52 were recorded with CIP (Code Identifiant de Présentation) codes. In hospital, only costly  
53 innovative drugs included in a special reimbursement process called “list en sus” were recorded,  
54 in the form of UCD (Unités Communes de Dispensation) codes. Both the UCD and CIP codes  
55 were linked to the ATC classification (Anatomical Therapeutic and Chemical classification) of  
56 the World Health Organization. Medical devices reimbursed by the French health insurance  
57 system (external prosthetics, orthotics, active implantable medical devices, invalid carriages,  
58 medical beds etc.) were recorded with LPP (Liste des produits et prestations) codes. In  
59 outpatient care, the type of medical service (teleconsultation, nursing care, dental care, etc.)  
60 was recorded with NGAP (Nomenclature Générale des Actes Professionnels) codes and the  
61 physician's specialty was recorded with an untitled nomenclature (variable PSE\_SPE\_COD).

### 62 Concomitant medication

63 The definition used to identify three months of full treatment was set at the scale of individual  
64 medications and depended on presentation and dose schedule.

- 65 • *Presentation* was binned into two categories: (1) identifiable individual units (*e.g.* box  
66 of pills, single-use syringe); (2) unidentifiable individual units (*e.g.* syrup bottle, tube  
67 of cream). Medication packaging was determined from the information (pill, solution,  
68 etc.) available in the SNDS database (Supplementary Table 3). Medications for which  
69 packing data were missing, or for which the packaging form was insufficient to  
70 determine the presentation category were manually checked by a pharmacologist.
- 71 • *Dose schedule* was defined as the recommended number of days between two units. If  
72 the medication was supposed to be administered several times per day, the dose schedule  
73 was set to 1. If the medication was supposed to be administered less frequently than  
74 once yearly, the dose schedule was set to 365. If several dose schedules existed for a  
75 particular medication, we selected the dose schedule corresponding to the largest  
76 number of days. If dose schedule depended on the patient's characteristics, such as  
77 weight or age, it was set as unknown. Dose schedules were determined manually by a  
78 pharmacologist.

79

80 At the patient scale, we defined three months of full treatment with a medication during the six  
81 months preceding BC diagnosis as one of the following:

82

- 83 • At least  $X$  identifiable individual units of the medication with a dose schedule of less  
84 than 180 days delivered in the six months preceding BC diagnosis, where  $X =$   
85  $C\left(\frac{90}{\text{dose schedule}}\right)$  and  $C$  is the ceiling function;
- 86 • At least one identifiable individual unit of the medication with a dose schedule strictly  
87 greater than 180 days in the year preceding BC diagnosis;
- 88 • At least two pharmacy deliveries of the medication as unidentifiable individual units or  
89 with an unknown dose schedule;

- 90 • At least  $Y$  identifiable individual units of the medication with dose schedule below 180  
91 days and one pharmacy delivery of the medication as unidentifiable individual units or  
92 with an unknown dose schedule in the six months preceding BC diagnosis; where  $Y =$   
93  $C\left(\frac{45}{\text{dose schedule}}\right)$  and  $C$  is the ceiling function.

94 Comorbid conditions

95 Following a literature review, the list of comorbid conditions considered was deduced from  
96 the union of all diseases used as covariates in 10 articles<sup>2-11</sup>. Overlapping categories were  
97 checked manually by a clinician who indicated the category and label to be used. The final list  
98 of comorbid conditions included 52 diseases (Supplementary Data), grouped into 12  
99 categories: (1) cardiovascular, (2) endocrine and metabolism, (3) frailty, (4) gastrointestinal,  
100 (5) immune, (6) kidney, (7) liver, (8) neurologic, (9) psychiatric disorders, (10) pulmonary,  
101 (11) rheumatologic disease and connective tissue disorders, and (12) other. The medical codes  
102 used in the 10 articles to identify the defined diseases in the 10 articles were aggregated into a  
103 single table. Several types of medical code were used: (1) ICD-10 diagnosis codes (ICD10),  
104 (2) ICD-10 diagnosis codes specific of long-term illness (ICD10 (specific for LTI)), (3)  
105 CCAM codes for medical procedures (CCAM), (4) LPP codes for medical devices (LPP), (5)  
106 NABM codes for biological acts (NABM), (6) NGAP codes for medical procedures  
107 performed by non-medical health practitioners (NGAP). Codes relating to medication  
108 deliveries (CIP and UCD) were not retained, to ensure that comorbid conditions were defined  
109 independently of exposure to medication. For a given comorbid conditions, the medical codes  
110 retained in only one article of the 10 listed above were manually checked by a clinician;  
111 whereas medical codes used in at least two articles were automatically validated. The final list  
112 of medical codes is given in Supplementary Data. A given comorbid condition was suspected  
113 at the time of BC diagnosis if: (1) there was at least one NABM, CCAM or LPP procedure

114 code associated with the given comorbid condition in the year preceding the date of BC  
115 diagnosis, (2) there was at least one LTI related to an ICD10 code associated with the given  
116 comorbid condition during the year preceding BC diagnosis, (3) there was at least one  
117 hospital discharge report containing an ICD10 diagnosis code associated with the comorbid  
118 condition concerned between 365 days before and up to 180 days after the date of BC  
119 diagnosis (we used 180 days after diagnosis to include the comorbid conditions noted by the  
120 surgeon at the time of first surgery for BC), or (4) the comorbid condition considered was  
121 “Frailty (proxy)” and the patient had at least 150 days of home nursing care (NGAP code  
122 “AIS”) in the year preceding BC diagnosis. Sensitivity analyses were conducted to evaluate  
123 the impact of comorbid conditions identification timing on the results. Two additional  
124 timeframes for diagnosis codes in hospital discharge reports were tested: (i) the year before  
125 BC diagnosis up to BC surgery, and (ii) the one-year period before BC surgery; resulting in  
126 two alternative definitions of comorbid conditions. The causal inference pipeline was then re-  
127 run with the modified definitions of comorbid conditions for the sixteen molecules that were  
128 identified as being associated with either OS, DFS, or both.

129 Other covariates

130 Pre-exposure covariates

131 (1) *Age at BC diagnosis*: Age at BC diagnosis was available directly from the FRESH  
132 database. It was calculated as the rounded difference, in years, between the date of BC  
133 diagnosis and date of birth<sup>12</sup>, and was included as a continuous variable in the  
134 propensity score models.

135 (2) *Deprivation index of the area of residence*: The area of residence was defined as the  
136 zip code of the French ‘*département*’ (equivalent to a county) of residence at the time  
137 of first BC surgery. We used the ‘FDep09’ geographic socioeconomic index as a  
138 measure of social deprivation, as described elsewhere<sup>13</sup>. This index was defined at the

139 'commune' (the smallest administrative unit in France) level in 2009, exclusively for  
140 mainland France. The *patient's deprivation index* was set as the mean 'FDep09' index  
141 for the 'communes' included in the patient's *département* of residence in mainland  
142 France. It was set as 'missing' for overseas *départements*. The *deprivation index* was  
143 classified into six categories: (1) "Overseas *départements*"; and the five quintiles of  
144 the distribution for patients living in mainland France: (2) "1<sup>st</sup> quintile (least  
145 deprived)", (3) "2<sup>nd</sup> quintile", (4) "3<sup>rd</sup> quintile", (5) "4<sup>th</sup> quintile" and (6) 5<sup>th</sup> quintile  
146 (most deprived). It was included as a categorical variable in the propensity score  
147 models.

148 (3) *Number of general practitioner (GP) visits in the year preceding BC diagnosis:*

149 General practitioner (GP) visits were identified by outpatient care visits with specialist  
150 code "1" (general practice), "22" (general practice specialist with diploma) or "23"  
151 (general practice specialist acknowledged by the French Medical Board). The *number*  
152 *of GP visits in the year preceding BC diagnosis* was calculated as the number of days  
153 with at least one GP visit during the 365 days preceding BC diagnosis. This variable  
154 was binned into the following categories: (1) 0 (no GP visits in the year preceding BC  
155 diagnosis); (2) 1 (one visit in the year preceding BC diagnosis); (3) 2-3 (two or three  
156 visits in the year preceding BC diagnosis); (4) 4+ (4 or more visits in the year  
157 preceding BC diagnosis).

158 (4) *Number of gynecologist visits in the year preceding BC diagnosis:* Gynecologist visits

159 were identified by outpatient care visits with specialist code "7" (obstetric  
160 gynecologist), "70" (medical gynecologist), "77" (obstetrician) or "79" (obstetric and  
161 medical gynecologist). The *number of gynecologist visits in the year preceding BC*  
162 *diagnosis* was calculated as the number of days with at least one gynecologist visit  
163 among the 365 days preceding BC diagnosis. The variable was binned into the

164 following categories: (1) 0 (no gynecologist visit in the year preceding BC diagnosis);  
165 (2) 1 (one visit in the year preceding BC diagnosis); (3) 2-3 (two or three visits in the  
166 year preceding BC diagnosis); (4) 4+ (4 or more visits in the year preceding BC  
167 diagnosis).

168 *(5) Performance of a mammographic screening in the year preceding BC diagnosis:*  
169 screening mammograms were identified based on the presence of the procedure code  
170 QEQK004 in both hospital and outpatient care records in the year preceding breast  
171 cancer diagnosis. The variable was binned into the following categories: 'yes' if the  
172 patient underwent a screening mammography in the year preceding breast cancer  
173 diagnosis, or 'no' otherwise.

174 *(6) Total number of medications to which the patient was exposed at the time of*  
175 *medication:* this variable was defined as the total number of medications other than  
176 the medication considered to which the patient was chronically exposed at diagnosis.  
177 The total number of medications to which the patient was exposed at the time of  
178 medication was classified into four categories: (1) "0"; (1) "1-2", (3) "3-5", and (4)  
179 "6+". It was included as a categorical variable in the propensity score models.

180 *(7) Exposure to other medications:* this variable was calculated as several binary variables,  
181 including: (A) exposure to medications in the second-level ATC classes other than that  
182 of the medication of interest, (B) exposure to medications in the other third-level ATC  
183 classes corresponding to the second-level ATC class of the medication of interest, (C)  
184 exposure to medications in the other fourth-level classes corresponding to the third-  
185 level ATC class of the medication of interest and (D) exposure to medications in the  
186 other fifth-level ATC classes corresponding to the fourth-level ATC class of the  
187 medication of interest. As an illustration, for exposure to other medications for  
188 A02AA01 we considered: (A) all ATC second-level classes other than A02; (B) A02B



189 and A02X; (C) A02AB, A02AC, A02AD, A02AF, A02AG, A02AH and A02AX; and  
190 (D) A02AA02, A02AA03, A02AA04, A02AA05, A02AA10. As with the medication  
191 of interest, only chronic exposure in the six months prior to BC diagnosis was  
192 considered. Exposure to ATC classes to which fewer than 300 patients were exposed  
193 was not included in the list of variables.

194

#### 195 Post-exposure covariates

196 Post-exposure covariates were directly available from the database<sup>12</sup>. Briefly, BC subtype was  
197 inferred from the BC treatments received, as (A) luminal, (B) TNBC (triple-negative breast  
198 cancer), (C) HER2-positive (human epidermal growth factor receptor 2-positive), and (D)  
199 undefined (if the patient was treated exclusively by surgery with or without radiotherapy).  
200 Nodal status (node-positive/negative), and BC treatments (chemotherapy, endocrine therapy)  
201 were classified in a binary manner.

#### 202 Causal inference pipeline and methods used

203 We denote as  $A$  the exposure (concomitant medication);  $X = X_1, \dots, X_n$  the confounding  
204 variables (pre-exposure covariates),  $Y$  the outcome (overall survival or disease-free survival),  
205  $M_1$  the inferred BC subtype and  $M_2$  the nodal status (mediators).  $A$  is a binary variable, taking  
206 a value of 0 for unexposed patients and 1 for exposed patients. The potential outcome  $Y^k$  is  
207 defined as the outcome that would have been observed had the patient been exposed to level  $k$ .  
208 For each patient, only one potential outcome is observed (the potential outcome for the current  
209 exposure level).  $X \perp Y \mid Z$  indicates that  $X$  is independent of  $Y$  conditional on  $Z$ . We denote  $a$   
210 and  $a^*$  as the two levels of exposure to be compared (here  $a^* = 1$  and  $a = 0$  as exposure is  
211 binary). For each subject, the effect of treatment is  $Y^{a^*} - Y^a$ . The average treatment effect at  
212 population level (ATE) is defined as  $ATE = E(Y^{a^*} - Y^a)$ .

213

214 Step 1: Adjustment by inverse probability of treatment weighting (IPTW)

215 For each patient, the propensity score (PS) was defined as the probability of being exposed to  
216 the given medication conditional on pre-exposure covariates (confounders)<sup>14</sup>.

217 
$$PS = Pr(A = 1 | X)$$

218

219 The PSs were estimated by a weighted logistic regression in which exposure was regressed on  
220 all pre-exposure covariates (sociodemographic covariates, comorbid conditions and other  
221 concomitant medications). The model was weighted by the inverse of the exposure distribution  
222 (one over the frequency of the given class) to account for the strong imbalance in the exposure  
223 distribution (in most cases, the proportion of the patients exposed to the medication was very  
224 small).

225

226 IPTW involves weighting the whole population to balance the distribution of the confounding  
227 variables between the exposed and unexposed patients<sup>15</sup>. The weight for each patient was  
228 defined as the inverse of the probability of the exposure received by the patient. We used  
229 stabilized weights to prevent the weights from becoming very large when PS values were very  
230 close to 0 or 1. These stabilized weights were calculated as follows:

231

232 
$$w = \frac{A \times Pr(A = 1)}{PS} + \frac{(1 - A) \times Pr(A = 0)}{1 - PS}$$

233

234 IPTW weights were trimmed at 5%, by recoding all weights outside the 2.5<sup>th</sup> and 97.5<sup>th</sup>  
235 percentiles with the values of the 2.5<sup>th</sup> and 97.5<sup>th</sup> percentiles, respectively, as advised  
236 elsewhere<sup>16</sup>.

237

238 Step 2: Adjustment quality check

239 The estimation of ATE by IPTW is dependent on three causal assumptions: (i) the single unit  
240 treatment values assumption (SUTVA), according to which there is only one version of  
241 treatment and no interference between patients ( $Y^k = Y$  when the observed exposure is  $k$ ), (ii)  
242 conditional ignorability, according to which the set of measured confounders is sufficient to  
243 adjust for confounding bias ( $Y^k \perp A|X$ ), and (iii) conditional positivity, according to which all  
244 patients have a non-zero probability of being exposed to each level of treatment ( $0 < \Pr(A =$   
245  $k) < 1$ ). We assumed SUTVA and conditional ignorability for all medications but validated  
246 conditional positivity *a posteriori* by checking adjustment quality by calculating the  
247 standardized mean difference (SMD) in the weighted dataset for each of the confounding  
248 variables. For continuous variables, SMD is derived as follows:

249 
$$SMD = \frac{\mu_{a^*} - \mu_a}{\sqrt{\frac{\sigma_{a^*}^2 + \sigma_a^2}{2}}}$$

250  
251 where  $\mu_{a^*}$  is the mean of the covariate in treated individuals ( $A = a^*$ ),  $\mu_a$  is the mean of the  
252 covariate in controls ( $A = a$ ),  $\sigma_{a^*}^2$  is the standard deviation of the covariate in treated  
253 individuals, and  $\sigma_a^2$  is the standard deviation of the covariate in controls. For categorical  
254 variables, SMD is estimated at each level, as follows:

255  
256 
$$SMD = \frac{p_{a^*} - p_a}{\sqrt{\frac{p_{a^*}(1 - p_{a^*}) + p_a(1 - p_a)}{2}}}$$

257  
258 where  $p_{a^*}$  is the (weighted) proportion of the given level among treated individuals and  $p_a$  is  
259 the (weighted) proportion of the given level among controls. Adjusted SMDs were calculated  
260 by weighting the mean and standard deviation with the inverse probability of treatment weights.

261 Provided that the conditional positivity assumption is satisfied and the model to estimate the  
262 propensity score is properly specified, the weighted SMDs should be zero for all confounding  
263 covariates. In accordance with published results<sup>14</sup>, the adjustment quality was considered  
264 insufficient if any SMD had an absolute value above 0.1, in which case the medication was  
265 discarded from subsequent analyses.

266

### 267 Step 3: Average treatment effect estimation

268 We used Wald tests calculated with robust covariances to draw statistical inferences about the  
269 estimated hazard ratio (HR). The threshold for statistical significance was  $p = 0.05$ .

270

### 271 Step 4: Mediation analyses

272 Medications with a significant ATE were selected for mediation analyses, which involved  
273 breaking down the ATE into several pathways passing through two potential mediators, BC  
274 subtype and nodal status (Supplementary Fig. 11). PSEs were estimated by a weighting  
275 approach<sup>17</sup> and are expressed as percentages of the total effect (which may be negative).  $M_1^a$   
276 denotes the counterfactual value for BC subtype that would have been observed had the  
277 exposure been set to level  $a$ ;  $M_2^{a,b}$  is the counterfactual value for nodal status that would have  
278 been observed had the exposure been set to level  $a$  and the BC subtype set to level  $b$ ; and  $Y^{a,b,c}$   
279 is the counterfactual value for the outcome that would have been observed had the exposure  
280 been set to level  $a$ , the BC subtype set to level  $b$  and the nodal status to level  $c$ .

281

282 We assumed BC subtype and nodal status to be causally related. Standard direct and indirect  
283 effects were not, therefore, directly identifiable for each mediator<sup>18</sup>. It was, nevertheless,  
284 possible to break the ATE down into three path-specific effects (PSEs): (1) the effect through  
285 pathways involving neither a difference in BC subtype nor in nodal status (direct effects); (2)

286 the effect through pathways involving a difference in nodal status only (effect through node);  
 287 (3) the effect through pathways involving a difference in BC subtype (and potentially involving  
 288 a difference in nodal status; effect through subtype). Path-specific effects (PSEs) were  
 289 estimated as described by Vanderweele<sup>17</sup>. PSE estimation was based on five assumptions: (1)  
 290 the counterfactual  $M_1^a, M_2^{a,M_1^a}$ , and  $Y^{a,M_1^a,M_2^{a,M_1^a}}$  equal  $M_1, M_2$  and  $Y$  when the observed exposure  
 291 is  $a$  (assumption of consistency); (2)  $Y^{a,b,c} \perp A | X$  (no unmeasured outcome-exposure  
 292 confounder); (3)  $Y^{a,b,c} \perp (M^1, M^2) | A, X$  (no unmeasured outcome-mediator confounder); (4)  
 293  $(M_1^a, M_2^{a,M_1^a}) \perp A | X$  (no unmeasured mediator-exposure confounder) and (5)  $Y^{1,b,c} \perp (M_1^0,$   
 294  $M_2^{0,M_1^0}) | X$  (cross-world independence assumption, satisfied if there is no unmeasured  
 295 confounder of the joint mediator  $(M_1, M_2)$  and the outcome affected by exposure). We will  
 296 assume that each of these five assumptions holds.

297

298 Under these assumptions, the effect through pathways involving neither BC subtype nor nodal  
 299 status (direct effect) was defined as:

$$300 \quad \text{Direct effect} = E \left( Y^{1,M_1^0,M_2^{0,M_1^0}} - Y^{0,M_1^0,M_2^{0,M_1^0}} \right).$$

301

302 The effect through pathways involving nodal status only (effect through node) was defined as

$$303 \quad \text{Effect through node} = E \left( Y^{1,M_1^0,M_2^{1,M_1^0}} - Y^{1,M_1^0,M_2^{0,M_1^0}} \right).$$

304

305 The effect through pathways involving BC subtype (and potentially involving nodal status,  
 306 denoted as effect through subtype) was defined as

$$307 \quad \text{Effect through subtype} = E \left( Y^{1,M_1^1,M_2^{1,M_1^1}} - Y^{1,M_1^0,M_2^{1,M_1^0}} \right).$$

308 We observe that:

309 Direct effect + Effect through node + Effect through subtype

310 
$$= E \left( Y^{1, M_1^1, M_2^1, M_1^1} - Y^{0, M_1^0, M_2^0, M_1^0} \right) = E(Y^1 - Y^0) = ATE.$$

311 Thus, the sum of the direct effect, the effect through nodal status and the effect through subtype  
312 equals the total effect.

313

314 PSEs were estimated by a weighting method described in detail elsewhere<sup>17</sup>. We first merged  
315 three copies of the dataset to which we added the “counterfactual exposure variables”  $A^*$  and  
316  $A^{**}$ .  $A^*$  was set to  $A$  for the first two replications and to  $1 - A$  for the third replication.  $A^{**}$  was  
317 set to  $A$  for the first replication and to  $1 - A$  for the second and third replications. We then  
318 computed a weight for each row of this new dataset:

319

320 
$$w = \frac{Pr(M^1|A^*, X) \times Pr(M^2|M^1, A^{**}, X)}{Pr(A|X) \times Pr(M^1|A, X) \times Pr(M^2|M^1, A, X)}.$$

321

322 The direct effect is estimated as the HR for  $A$  in a weighted Cox model regressing  $Y$  on  $A$ ,  
323 fitted for patients with  $A^* = A^{**} = 0$ . The effect through node is estimated as the HR for  $A^*$  of  
324 a weighted Cox model regressing  $Y$  on  $A^*$ , fitted for patients with  $A = 1$  and  $A^{**} = 0$ . The  
325 effect through subtype is estimated as the HR for  $A^{**}$  of a weighted Cox model regressing  $Y$  on  
326  $A^{**}$ , fitted for patients with  $A = 1$  and  $A^* = 1$ . Confidence intervals were obtained by  
327 bootstrapping (50 repetitions).

328

329 In addition to path-specific HR, the percentage of the total effect attributable to each path was  
330 calculated as follows:

331 
$$\frac{100 * \log(PSE)}{\log(ATE)},$$

332 where PSE took the value of the Cox hazard ratio obtained for direct effect, effect through  
333 subtype or effect through node. This pseudopercentage could take negative values or values  
334 greater than 100 if the total effect could be broken down into PSEs with different signs.

335

#### 336 Step 5: Kaplan-Meier survival curves

337 Weighted Kaplan-Meier survival curves were compared with an adjusted log-rank test<sup>19</sup>. The  
338 threshold for statistical significance was set at  $p = 0.1$ , due to the low power of adjusted log-  
339 rank tests<sup>20</sup>. The Benjamini-Hochberg multiple testing procedure was applied to all statistical  
340 tests performed, including subgroup analyses for BC subtype, nodal status, chemotherapy  
341 status, and endocrine therapy status.

#### 342 Software

343 Propensity scores were computed with the *glm* function from the R base package stats.  
344 Standardized mean differences (SMDs) were computed with the *bal.tab* function from the R  
345 package cobalt (version 4.1.0). Cox proportional hazards models were fitted with the *coxph*  
346 function from the R package survival (version 3.2-3). Weighted Kaplan-Meier estimators were  
347 obtained with the R package RISCA (version 0.8.2). Survival curves were drawn with the R  
348 package survminer (version 0.4.7).  
349 The web application was built with Flask version 2.0.2, using Python version 3.9.1.

350

351



352 Supplementary Tables

353 Supplementary Table 1: Results of sensitivity analyses. Estimated average treatment effect  
354 (ATE, Cox hazard ratio) for overall survival (OS) and disease-free survival (DFS), along with  
355 its 95% confidence interval, and p-value for the 16 medications significantly associated with  
356 OS, DFS, or both, after adjustment for multiple testing, obtained with two alternative  
357 timeframes for the use of diagnosis codes in hospital discharge to identify comorbid  
358 conditions. We used two-sided Wald tests with robust covariances for statistical inference. No  
359 adjustment for multiple comparisons was made at this stage of the pipeline. \*(vaginal or  
360 transmucosal)

| ATC code | Molecule         | Overall survival                                                        |             |              |                                                                                                            |             |              | Disease-free survival                                                   |             |              |                                                                                                            |             |              |
|----------|------------------|-------------------------------------------------------------------------|-------------|--------------|------------------------------------------------------------------------------------------------------------|-------------|--------------|-------------------------------------------------------------------------|-------------|--------------|------------------------------------------------------------------------------------------------------------|-------------|--------------|
|          |                  | Hospital discharge reports up to BC surgery<br>(sensitivity analysis 1) |             |              | Hospital discharge reports pertaining to the 1-year period prior to BC surgery<br>(sensitivity analysis 2) |             |              | Hospital discharge reports up to BC surgery<br>(sensitivity analysis 1) |             |              | Hospital discharge reports pertaining to the 1-year period prior to BC surgery<br>(sensitivity analysis 2) |             |              |
|          |                  | HR                                                                      | 95% CI      | P            | HR                                                                                                         | 95% CI      | P            | HR                                                                      | 95% CI      | P            | HR                                                                                                         | 95% CI      | P            |
| A02BC04  | Rabeprazole      | 0.77                                                                    | 0.65 - 0.91 | 2.158842e-03 | 0.77                                                                                                       | 0.65 - 0.91 | 2.195847e-03 | 0.84                                                                    | 0.72 - 0.99 | 3.405849e-02 | 0.84                                                                                                       | 0.72 - 0.99 | 3.500805e-02 |
| A03AX08  | Alverine         | 0.79                                                                    | 0.67 - 0.92 | 2.420743e-03 | 0.79                                                                                                       | 0.67 - 0.92 | 2.246826e-03 | 0.86                                                                    | 0.77 - 0.97 | 1.158576e-02 | 0.86                                                                                                       | 0.77 - 0.97 | 1.136688e-02 |
| B03AA02  | Ferrous fumarate | 1.71                                                                    | 1.25 - 2.33 | 7.210579e-04 | 1.70                                                                                                       | 1.25 - 2.32 | 7.210161e-04 | 1.38                                                                    | 1.07 - 1.78 | 1.468258e-02 | 1.37                                                                                                       | 1.06 - 1.77 | 1.547688e-02 |
| C07AB03  | Atenolol         | 0.74                                                                    | 0.62 - 0.88 | 8.426483e-04 | 0.74                                                                                                       | 0.63 - 0.88 | 8.455132e-04 | 0.80                                                                    | 0.66 - 0.95 | 1.293721e-02 | 0.79                                                                                                       | 0.66 - 0.95 | 1.254294e-02 |
| C10AA01  | Simvastatin      | 0.73                                                                    | 0.61 - 0.88 | 1.028553e-03 | 0.73                                                                                                       | 0.6 - 0.88  | 8.45205e-04  | 0.76                                                                    | 0.63 - 0.92 | 5.501827e-03 | 0.76                                                                                                       | 0.63 - 0.92 | 4.968454e-03 |
| C10AA07  | Rosuvastatin     | 0.64                                                                    | 0.55 - 0.75 | 3.08569e-08  | 0.64                                                                                                       | 0.55 - 0.75 | 2.184199e-08 | 0.72                                                                    | 0.63 - 0.82 | 1.07842e-06  | 0.72                                                                                                       | 0.63 - 0.82 | 8.912143e-07 |
| G03JA05  | Estriol*         | 0.55                                                                    | 0.4 - 0.75  | 1.79207e-04  | 0.55                                                                                                       | 0.4 - 0.75  | 1.732795e-04 | 0.77                                                                    | 0.62 - 0.96 | 1.947101e-02 | 0.77                                                                                                       | 0.62 - 0.96 | 1.923632e-02 |
| G03KC01  | Nomegestrol      | 0.40                                                                    | 0.26 - 0.61 | 1.84932e-05  | 0.40                                                                                                       | 0.26 - 0.62 | 2.501424e-05 | 0.73                                                                    | 0.59 - 0.9  | 3.380206e-03 | 0.73                                                                                                       | 0.59 - 0.91 | 4.679704e-03 |
| H02AB06  | Prednisolone     | 1.77                                                                    | 1.18 - 2.66 | 5.70612e-03  | 1.77                                                                                                       | 1.18 - 2.66 | 5.9349e-03   | 1.65                                                                    | 1.19 - 2.29 | 2.426888e-03 | 1.65                                                                                                       | 1.19 - 2.29 | 2.691233e-03 |
| H03BB01  | Carbimazole      | 1.27                                                                    | 0.95 - 1.7  | 1.04905e-01  | 1.27                                                                                                       | 0.95 - 1.7  | 1.048807e-01 | 1.45                                                                    | 1.14 - 1.85 | 2.879329e-03 | 1.45                                                                                                       | 1.14 - 1.85 | 2.78257e-03  |
| J01FG01  | Pristinamycin    | 1.90                                                                    | 1.39 - 2.61 | 6.013807e-05 | 1.90                                                                                                       | 1.38 - 2.6  | 6.727279e-05 | 1.65                                                                    | 1.25 - 2.17 | 3.870899e-04 | 1.64                                                                                                       | 1.25 - 2.16 | 4.242708e-04 |
| N05BA04  | Oxazepam         | 1.30                                                                    | 1.15 - 1.47 | 2.422258e-05 | 1.30                                                                                                       | 1.15 - 1.48 | 2.367675e-05 | 1.22                                                                    | 1.09 - 1.36 | 7.026809e-04 | 1.22                                                                                                       | 1.09 - 1.36 | 6.923283e-04 |
| N05BA12  | Alprazolam       | 1.07                                                                    | 0.98 - 1.18 | 1.44468e-01  | 1.07                                                                                                       | 0.97 - 1.18 | 1.577624e-01 | 1.12                                                                    | 1.04 - 1.2  | 2.30708e-03  | 1.12                                                                                                       | 1.04 - 1.2  | 2.485021e-03 |
| N05BB01  | Hydroxyzine      | 1.21                                                                    | 1.07 - 1.38 | 3.215996e-03 | 1.21                                                                                                       | 1.07 - 1.38 | 3.274543e-03 | 1.18                                                                    | 1.06 - 1.31 | 2.442714e-03 | 1.18                                                                                                       | 1.06 - 1.31 | 2.511346e-03 |
| N06AX03  | Mianserin        | 1.36                                                                    | 1.14 - 1.62 | 5.790888e-04 | 1.35                                                                                                       | 1.14 - 1.61 | 7.245282e-04 | 1.23                                                                    | 1.05 - 1.44 | 1.079401e-02 | 1.23                                                                                                       | 1.05 - 1.44 | 1.194082e-02 |
| S01KA02  | Hypromellose     | 0.77                                                                    | 0.62 - 0.94 | 1.059597e-02 | 0.77                                                                                                       | 0.62 - 0.94 | 1.0988e-02   | 0.77                                                                    | 0.65 - 0.91 | 1.745259e-03 | 0.77                                                                                                       | 0.65 - 0.91 | 1.801362e-03 |

362 Abbreviations: ATC: Anatomical Therapeutic Chemical; BC: Breast Cancer; HR: Hazard Ratio; CI: Confidence Interval

363 Supplementary Table 2: List of ATC classes discarded from the analyses.  
 364

| ATC code | ATC name                                            | Reason to discard               |
|----------|-----------------------------------------------------|---------------------------------|
| B05B     | I.V. solutions                                      | No systemically active molecule |
| B05XA03  | Sodium chloride                                     | No systemically active molecule |
| D02AA    | Silicone products                                   | No systemically active molecule |
| D02AC    | Soft paraffin and fat products                      | No systemically active molecule |
| D02AD    | Liquid plasters                                     | No systemically active molecule |
| D02AE    | Carbamide products                                  | No systemically active molecule |
| D02AF    | Salicylic acid preparations                         | No systemically active molecule |
| D02AX    | Other emollients and protectives                    | No systemically active molecule |
| D08      | Antiseptics and disinfectants                       | No systemically active molecule |
| G01AX11  | Povidone-iodine                                     | No systemically active molecule |
| L01      | Antineoplastic agents                               | Cancer treatment                |
| L02      | Endocrine therapy                                   | Cancer treatment                |
| L03AX03  | BCG vaccine                                         | Cancer treatment                |
| S01XA20  | Artificial tears and other indifferent preparations | No systemically active molecule |
| V04      | Diagnostic agents                                   | Diagnostic agent                |
| V07      | All other non-therapeutic products                  | No systemically active molecule |
| V08      | Contrast media                                      | Diagnostic agent                |

365  
 366 *Abbreviations: ATC: Anatomical Therapeutic Chemical.*

367 Supplementary Table 3: Medication presentation according to the medication packaging form.

368

| Packaging form (English) | Packaging form (French) | Presentation                         |
|--------------------------|-------------------------|--------------------------------------|
| Dressing                 | <i>PANSEMENT</i>        | Identifiable individual units        |
| Film                     | <i>FILM</i>             |                                      |
| Granule                  | <i>GRANULE</i>          |                                      |
| Gum                      | <i>GOMME</i>            |                                      |
| Hard gelatine capsule    | <i>GELULE</i>           |                                      |
| Implant                  | <i>IMPLANT</i>          |                                      |
| Lyophilizate             | <i>LYOPHILISAT</i>      |                                      |
| Pastille                 | <i>PASTILLE</i>         |                                      |
| Pill                     | <i>PILULE</i>           |                                      |
| Plaster                  | <i>EMPLATRE</i>         |                                      |
| Rectal suppository       | <i>SUPPOSITOIRE</i>     |                                      |
| Soft gelatin capsule     | <i>CAPSULE MOLLE</i>    |                                      |
| Tablet                   | <i>COMPRIME</i>         |                                      |
| Transdermal patch        | <i>DISPOSITIF</i>       |                                      |
| Vaginal suppository      | <i>OVULE</i>            |                                      |
| Collyrium                | <i>COLLYRE</i>          | Unidentifiable individual units      |
| Cream                    | <i>CREME</i>            |                                      |
| Dressing gauze           | <i>COMPRESSE</i>        |                                      |
| Emulsion                 | <i>EMULSION</i>         |                                      |
| Foam                     | <i>MOUSSE</i>           |                                      |
| Gel                      | <i>GEL</i>              |                                      |
| Inhalation               | <i>GAZ</i>              |                                      |
| Lotion                   | <i>LOTION</i>           |                                      |
| Mouthwash                | <i>BAIN DE BOUCHE</i>   |                                      |
| Nail polish              | <i>VERNIS</i>           |                                      |
| Ointment                 | <i>POMMADE</i>          |                                      |
| Paste                    | <i>PATE</i>             |                                      |
| Shampoo                  | <i>SHAMPOOING</i>       |                                      |
| Solvent                  | <i>SOLVANT</i>          |                                      |
| Syrup                    | <i>SIROP</i>            |                                      |
| Granules                 | <i>GRANULES</i>         | Manually checked at medication scale |
| Powder                   | <i>POUDRE</i>           |                                      |
| Solution                 | <i>SOLUTION</i>         |                                      |
| Suspension               | <i>SUSPENSION</i>       |                                      |
| <i>Missing</i>           |                         |                                      |

369

370 Medications for which the packaging form was not sufficient to decide on a presentation

371 category were manually checked by a pharmacologist for classification as either “Identifiable  
372 individual units” or “Unidentifiable individual units.

373 Supplementary Figures

374 Supplementary Figure 1: Frequency and number of comorbid conditions for the total population, by deprivation index and by age at BC diagnosis  
 375 diagnosis.

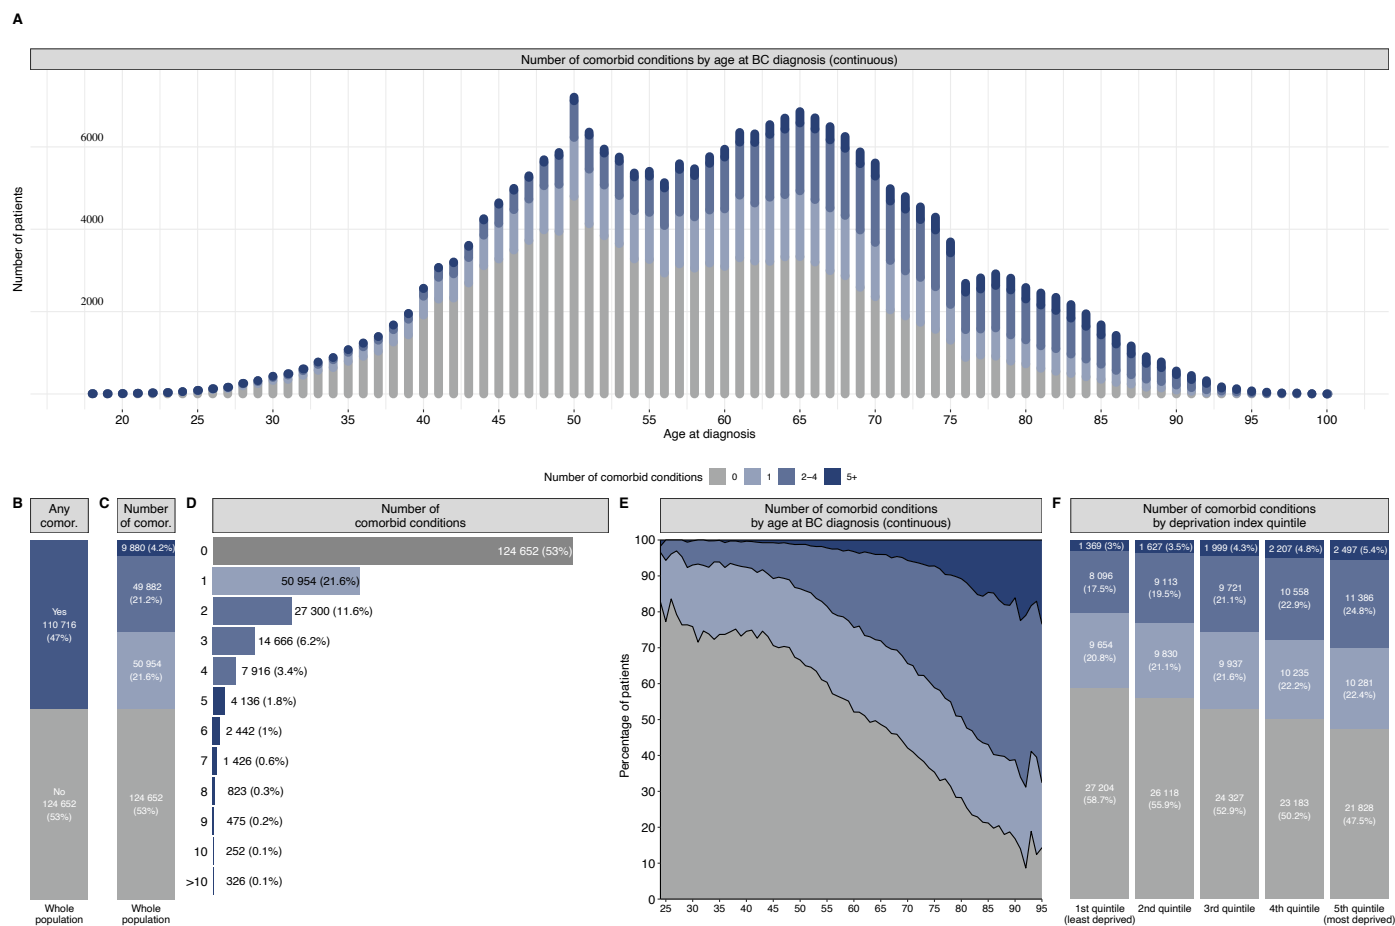

377 (A) Number of comorbid conditions, by age at BC diagnosis; (B) Presence of a comorbid condition at BC diagnosis in the total population; (C)  
378 Number of comorbid conditions, by class, for the total population; (D) Number of comorbid conditions in the total population; (E) Number of  
379 comorbid conditions, by age at BC diagnosis (as a percentage); (F) Number of comorbid conditions by deprivation index quintile. Patients from  
380 overseas départements for whom deprivation index quintile data were missing (n=4,198) are not displayed on the figure. Source data are  
381 provided as a Source Data file. Abbreviations: comor.: comorbid condition(s); BC: breast cancer

382 Supplementary Figure 2: Association between comorbid conditions (at disease level).

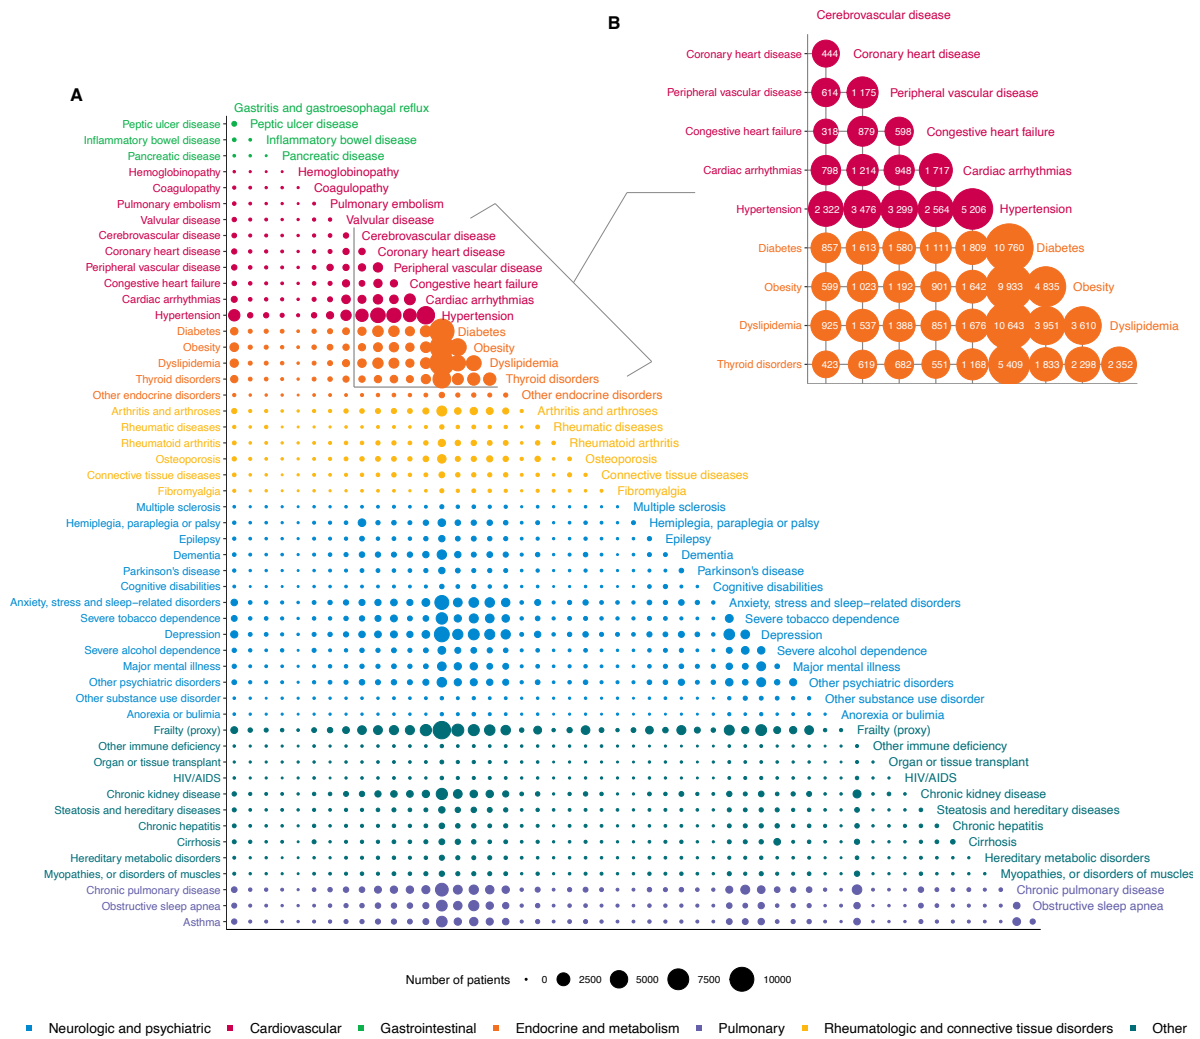

383

384 (A) Association between all diseases. The size of the circle is proportional to the number of  
 385 patients suffering from both comorbid conditions. Diseases are color-coded by category. (B)  
 386 Associations between several selected frequent cardiovascular and endocrine diseases, with  
 387 numbers of patients. Source data are provided as a Source Data file. *Abbreviations: HIV:*  
 388 *human immunodeficiency virus, AIDS: acquired immunodeficiency syndrome.*



389 Supplementary Figure 3: Screenshot of the web page for visualizing the associations between comorbid conditions within the ADRENALINE  
390 application ([https://adrenaline.curie.fr/static/network\\_comor/index.html](https://adrenaline.curie.fr/static/network_comor/index.html)).

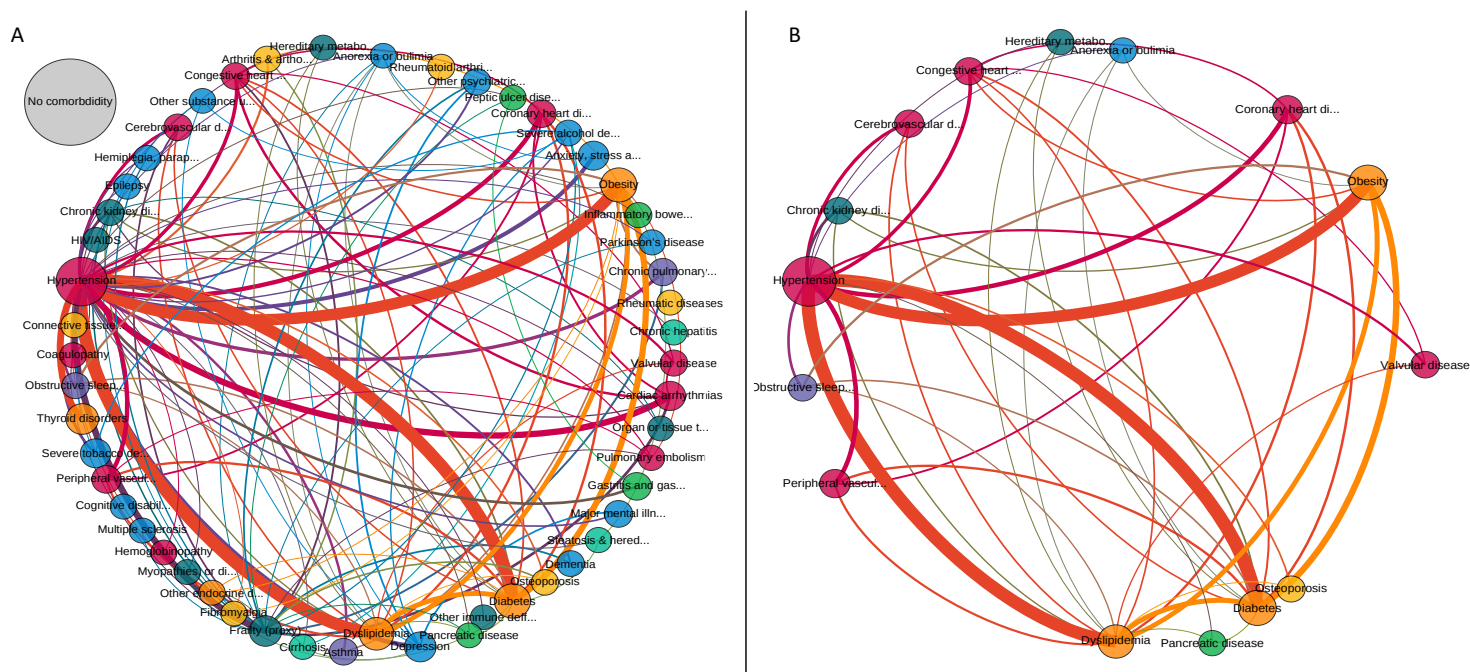

391  
392 (A) General page screenshot. Nodes represent comorbid conditions (at disease level). Edges represent associations between comorbid conditions.  
393 An edge between two comorbidities is displayed only if at least 20% of the patients suffering from either of the two diseases also suffer from the  
394 other disease. Edge width is proportional to the number of patients suffering from both diseases. A node for patients without comorbid conditions  
395 was added for comparison. (B) Screenshot of the web page after clicking on “Dyslipidemia”. Clicking on a node hides all nodes other than those  
396 connected to the selected disease, and all edges except those between the remaining nodes. Source data are provided as a Source Data file.  
397 Abbreviations: HIV: human immunodeficiency virus, AIDS: acquired immunodeficiency syndrome.

398 Supplementary Figure 4: Association between medications (at ATC level 2) and comorbid conditions (at category level).

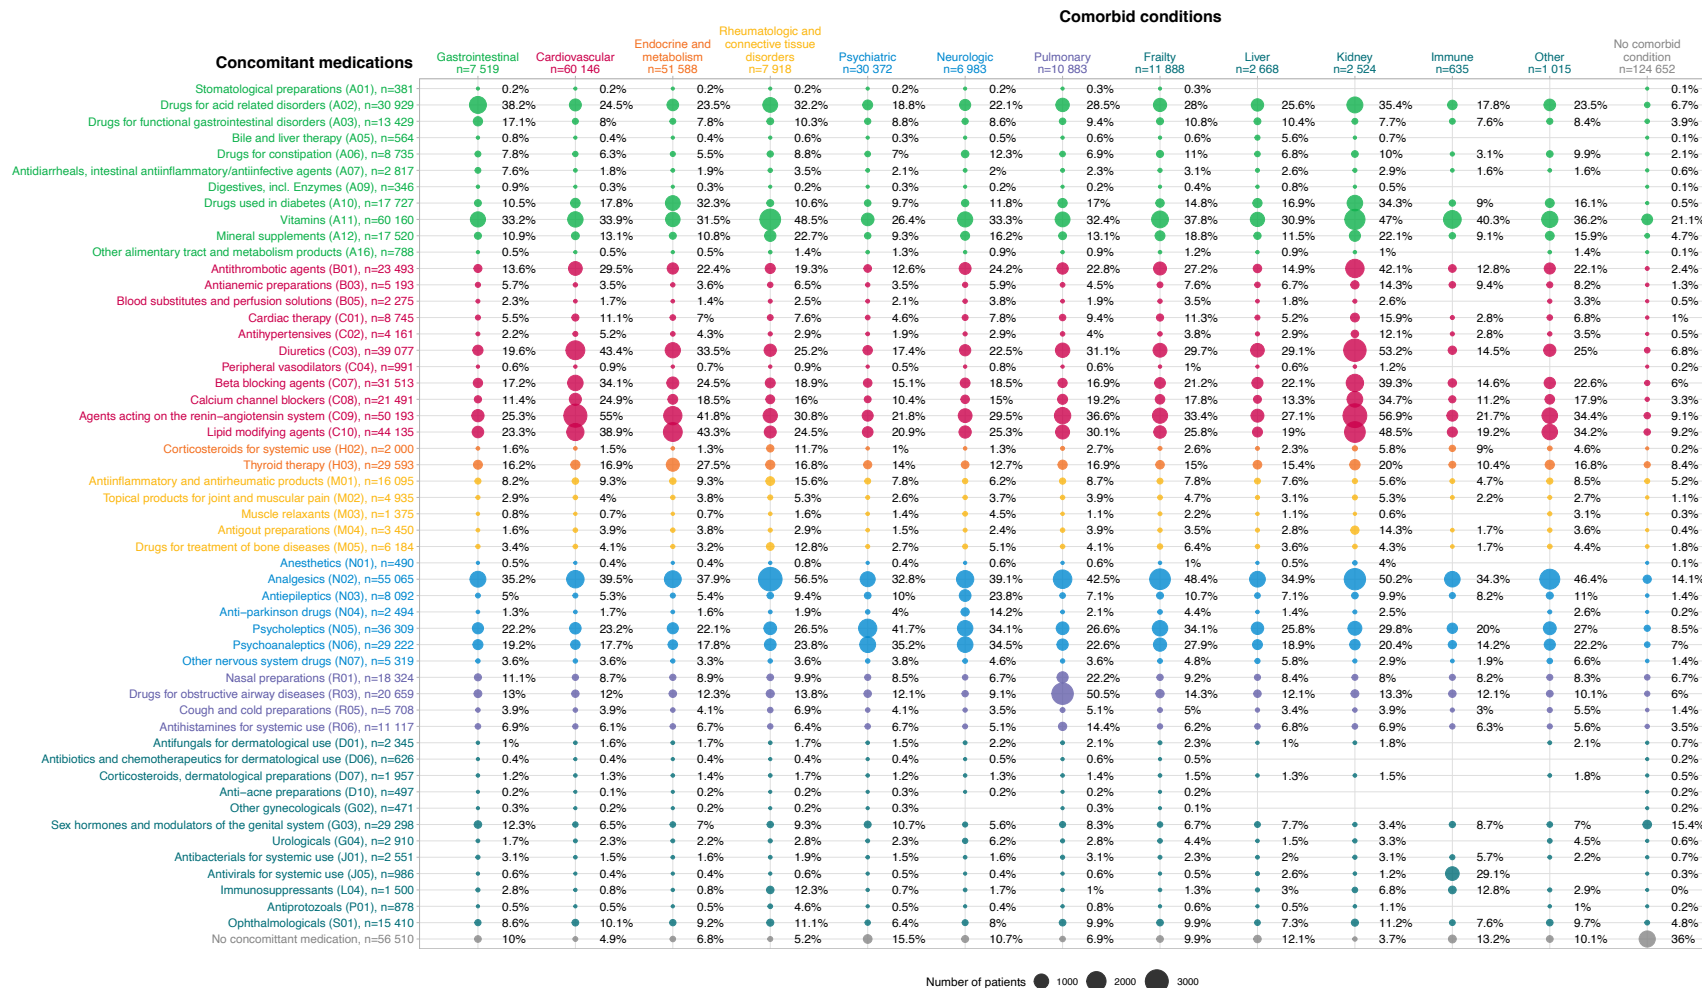

400 The size of the circle accounts for the percentage of patients suffering from the comorbid condition who used the medication at BC diagnosis;  
401 crude percentages of patients are displayed to the right of the circles. Circles are color-coded according to the ATC. Source data are provided as a  
402 Source Data file.

403 Supplementary Figure 5: Frequency and number of medications used at the time of BC diagnosis, for the total population, by deprivation index  
 404 and by age at BC diagnosis.

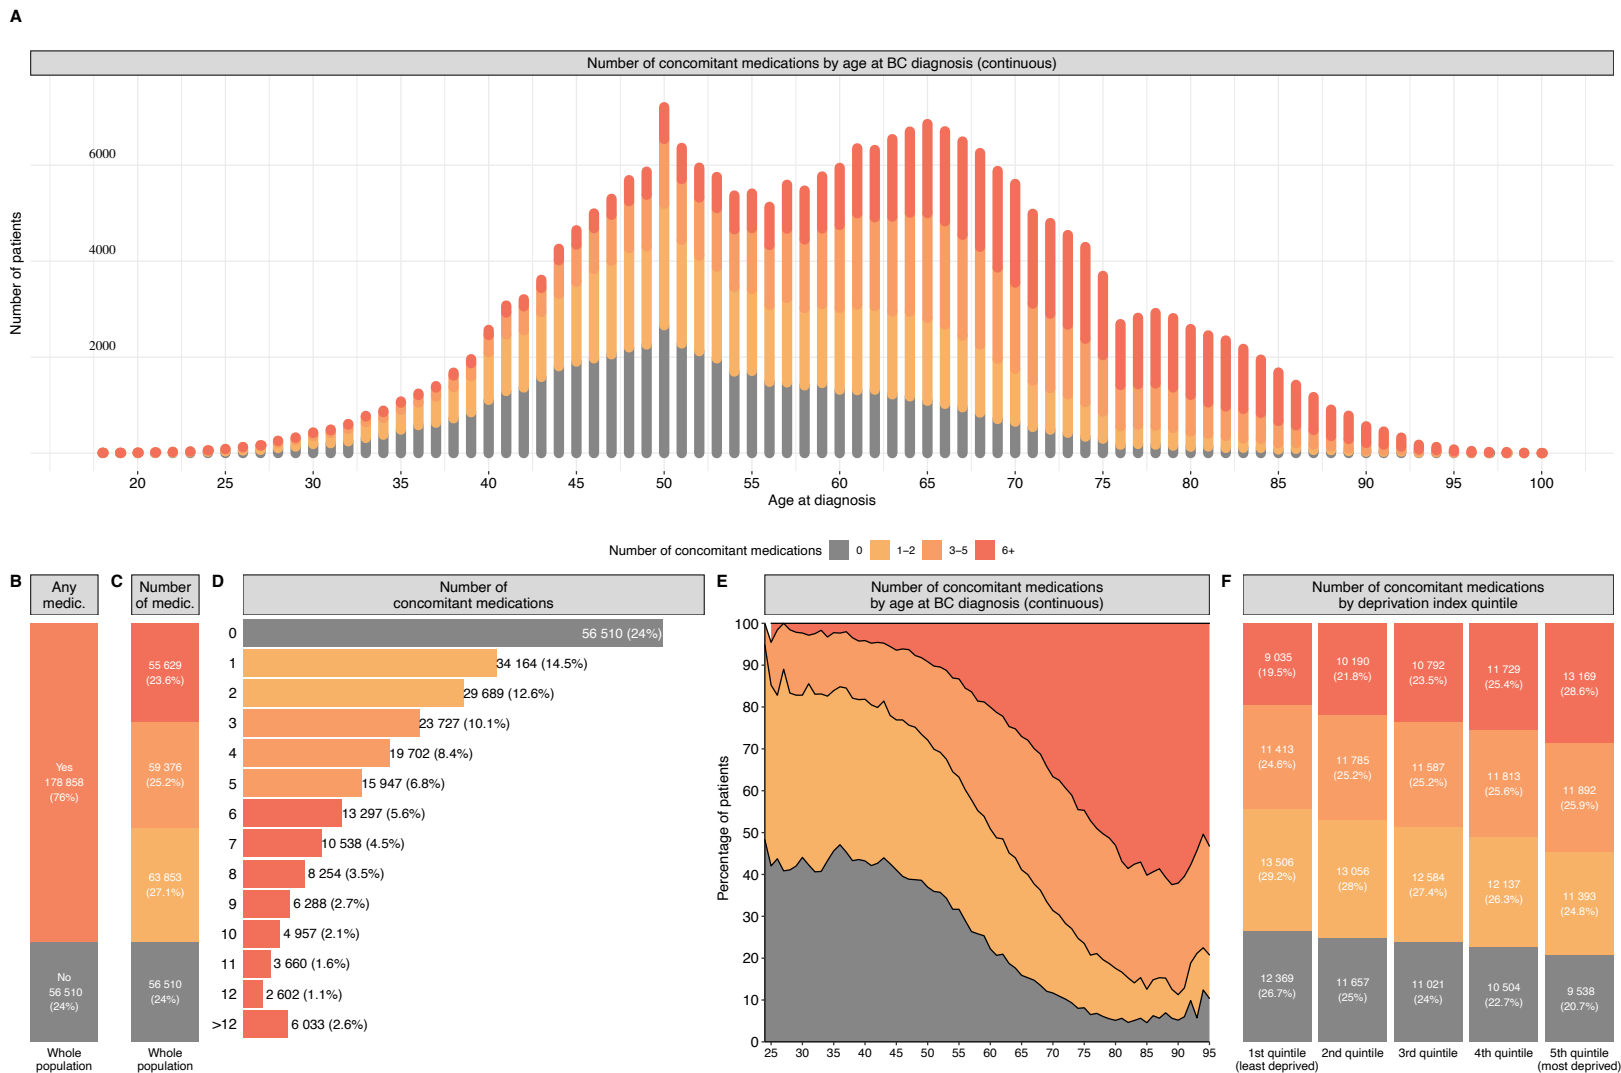

405

406 (A) Number of medications used concomitantly with BC diagnosis, by age at BC diagnosis; (B) Presence of concomitant medication use at BC  
407 diagnosis for the total population; (C) Number of concomitant medications, by class, for the total population; (D) Number of medications used at  
408 the time of BC diagnosis for the total population; (E) Number of medications used at the time of BC diagnosis, by age at BC diagnosis (as a  
409 percentage); (F) Number of medications used at the time of BC diagnosis, by deprivation index quintile. Patients from overseas départements  
410 with no data for deprivation index quintile (n=4,198) are not displayed in the figure. Source data are provided as a Source Data file.  
411 Abbreviations: ATC: Anatomical Therapeutic Chemical.

412 Supplementary Figure 6: Association between medications (at ATC level 2).

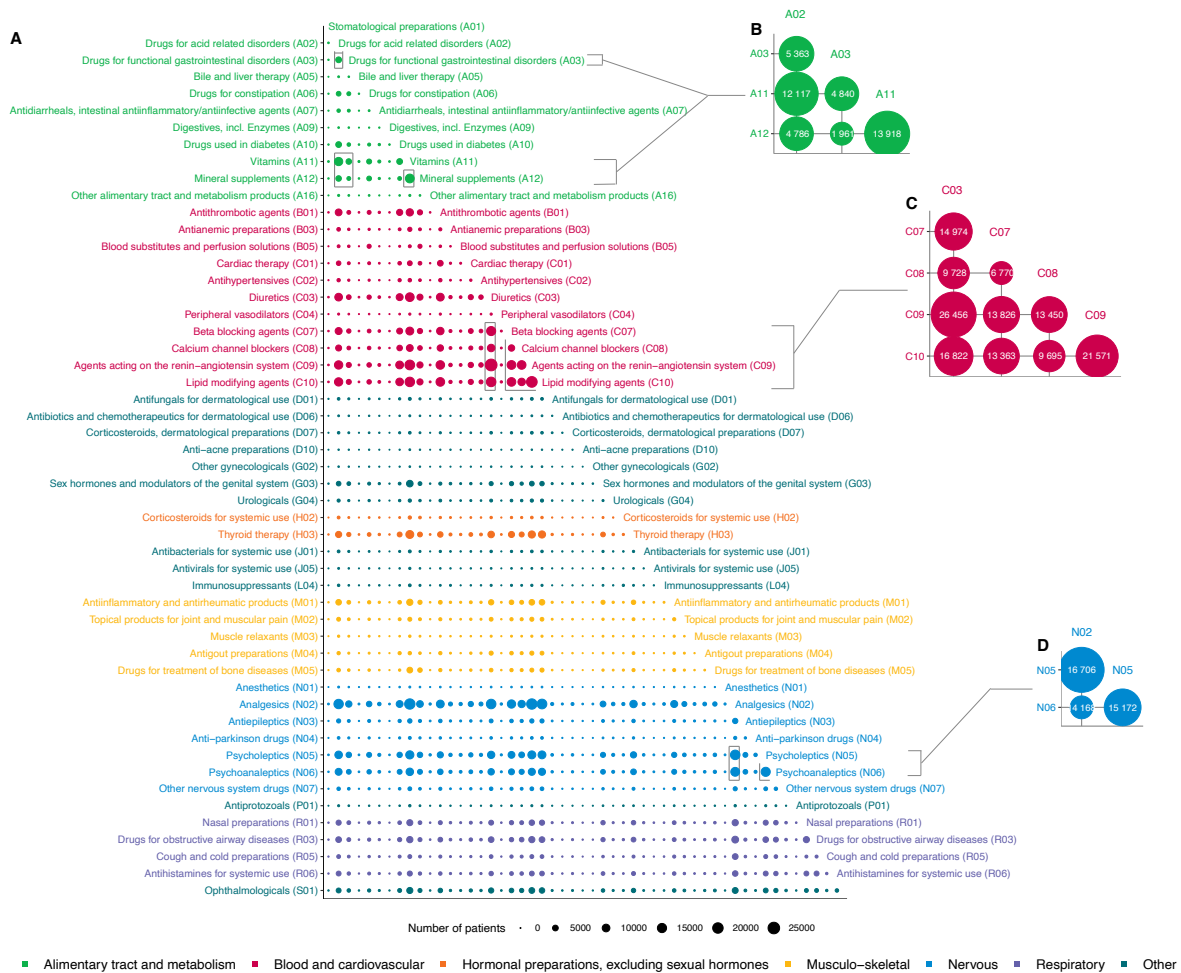

413  
 414 (A) Association between all ATC level 2 classes. The size of the circle is proportional to the  
 415 number of patients using medications from both ATC level 2 classes. Comedications are  
 416 color-coded according to their ATC level 1 category. (B) Associations between several  
 417 selected frequently used ATC level 2 classes corresponding to ATC level 1 “A” (alimentary  
 418 tract and metabolism), with crude numbers of patients. (C) Associations between several  
 419 selected frequently used ATC level 2 classes corresponding to ATC level 1 “C”  
 420 (cardiovascular system), with crude numbers of patients. (D) Associations between several  
 421 selected frequently used ATC level 2 classes corresponding to ATC level 1 “N” (nervous  
 422 system), with crude numbers of patients. Source data are provided as a Source Data file.  
 423 Abbreviations: ATC: Anatomical Therapeutic Chemical.  
 424

425 Supplementary Figure 7: Screenshot of the web page for visualizing associations between  
426 medications at ATC level 5 within the ADRENALINE web application  
427 (<https://adrenaline.curie.fr/static/network/index.html>).  
428

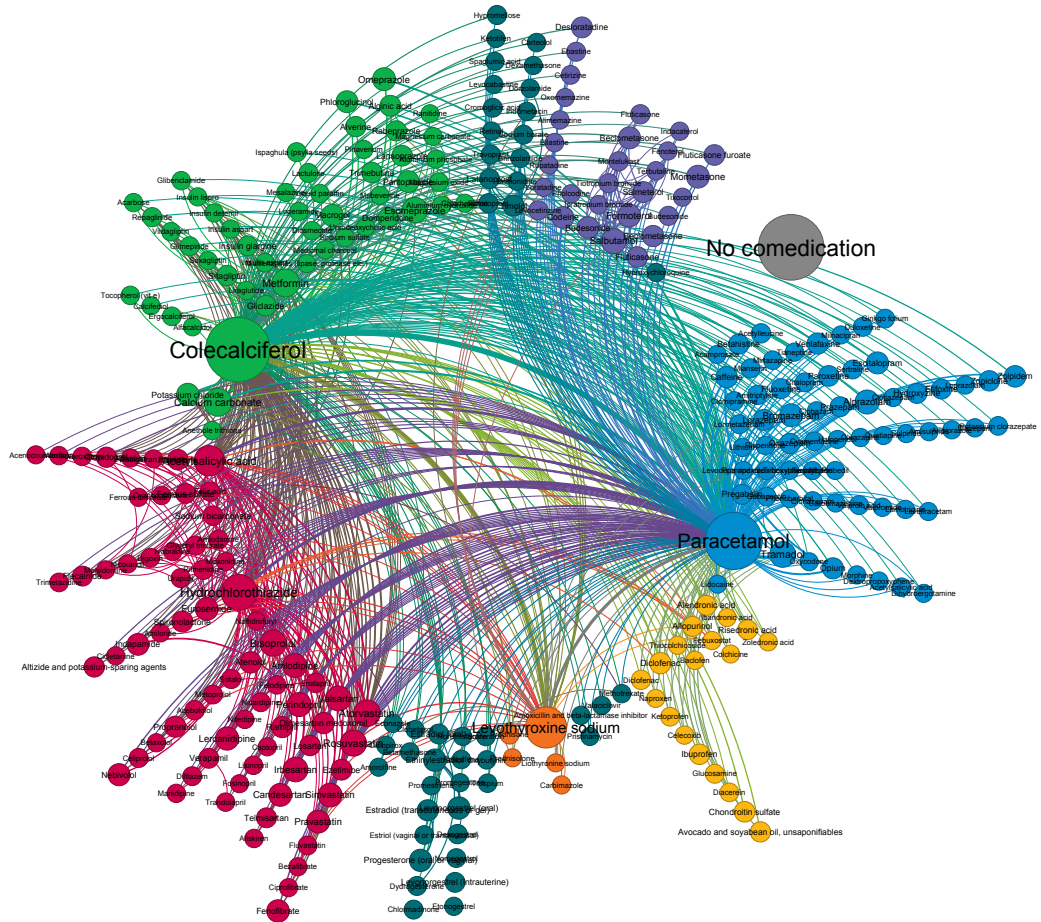

429  
430 Nodes represent medications. Edges represent associations between medications. An edge  
431 between two medications (comedication) is displayed only if at least 20% of patients using  
432 one of the two medications also uses the other medication. Edge width is proportional to the  
433 number of patients using both medications. A node for patients without comedication has  
434 been added for comparison. Source data are provided as a Source Data file. Abbreviations:  
435 ATC: Anatomical Therapeutic Chemical.

436 Supplementary Figure 8: Association between the number of comorbid conditions and the  
437 number of medications.

438

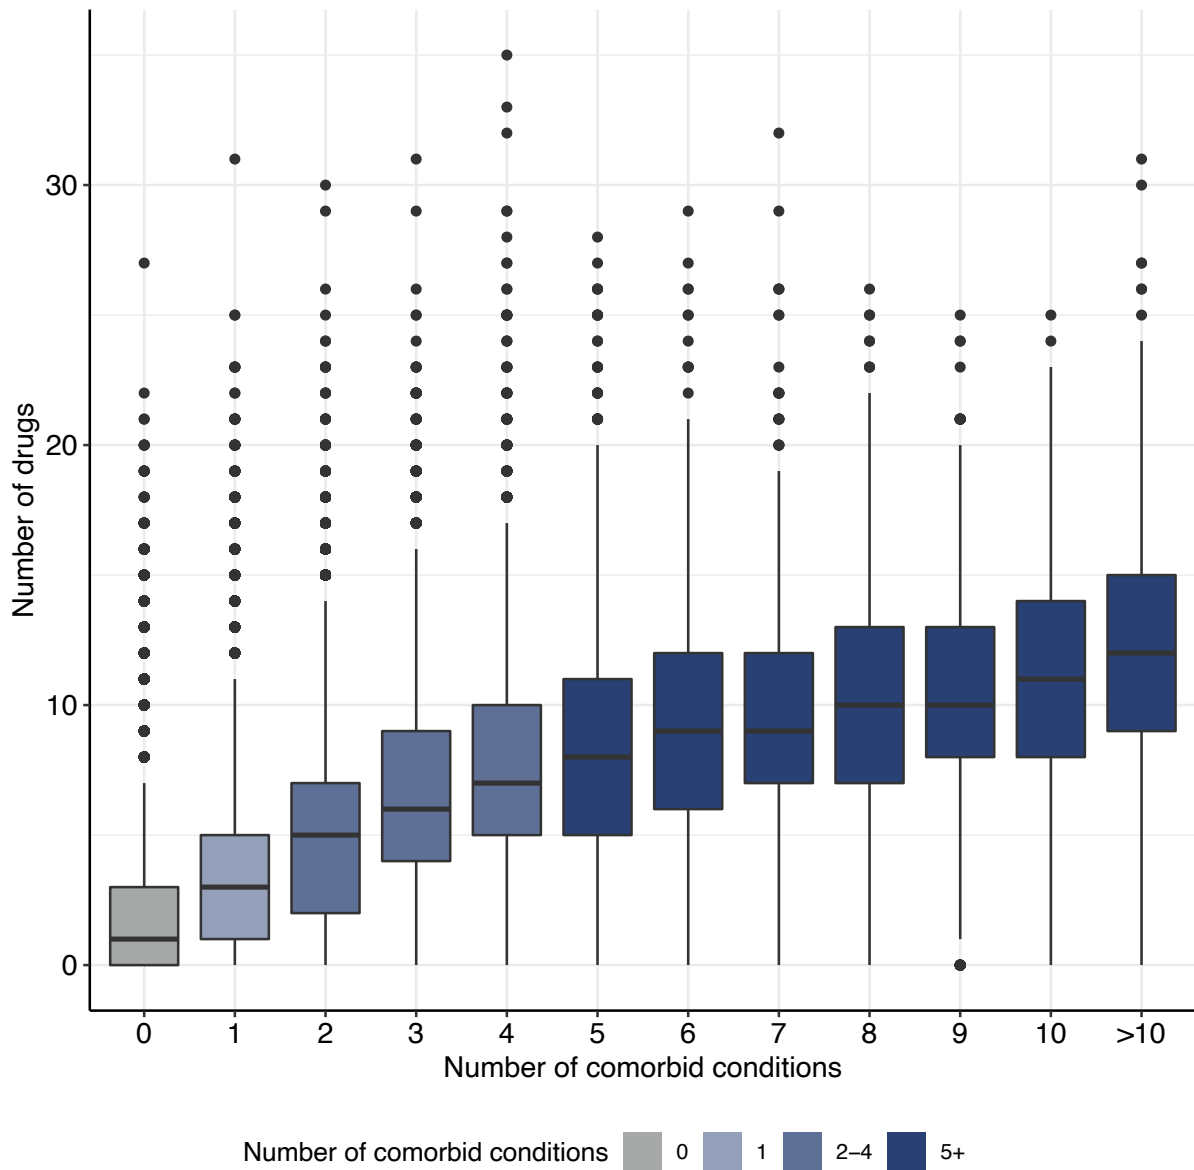

439

440 Boxplots are color-coded according to the number of comorbid conditions. The bars at the  
441 bottom and top of the boxplots represent the first and third quartiles, respectively. The bar in  
442 the middle corresponds to the median; and whiskers extend to 1.5 times the interquartile range  
443 Source data are provided as a Source Data file.



444 Supplementary Figure 9: Simplified flowchart of the French Early Breast Cancer Cohort.

445

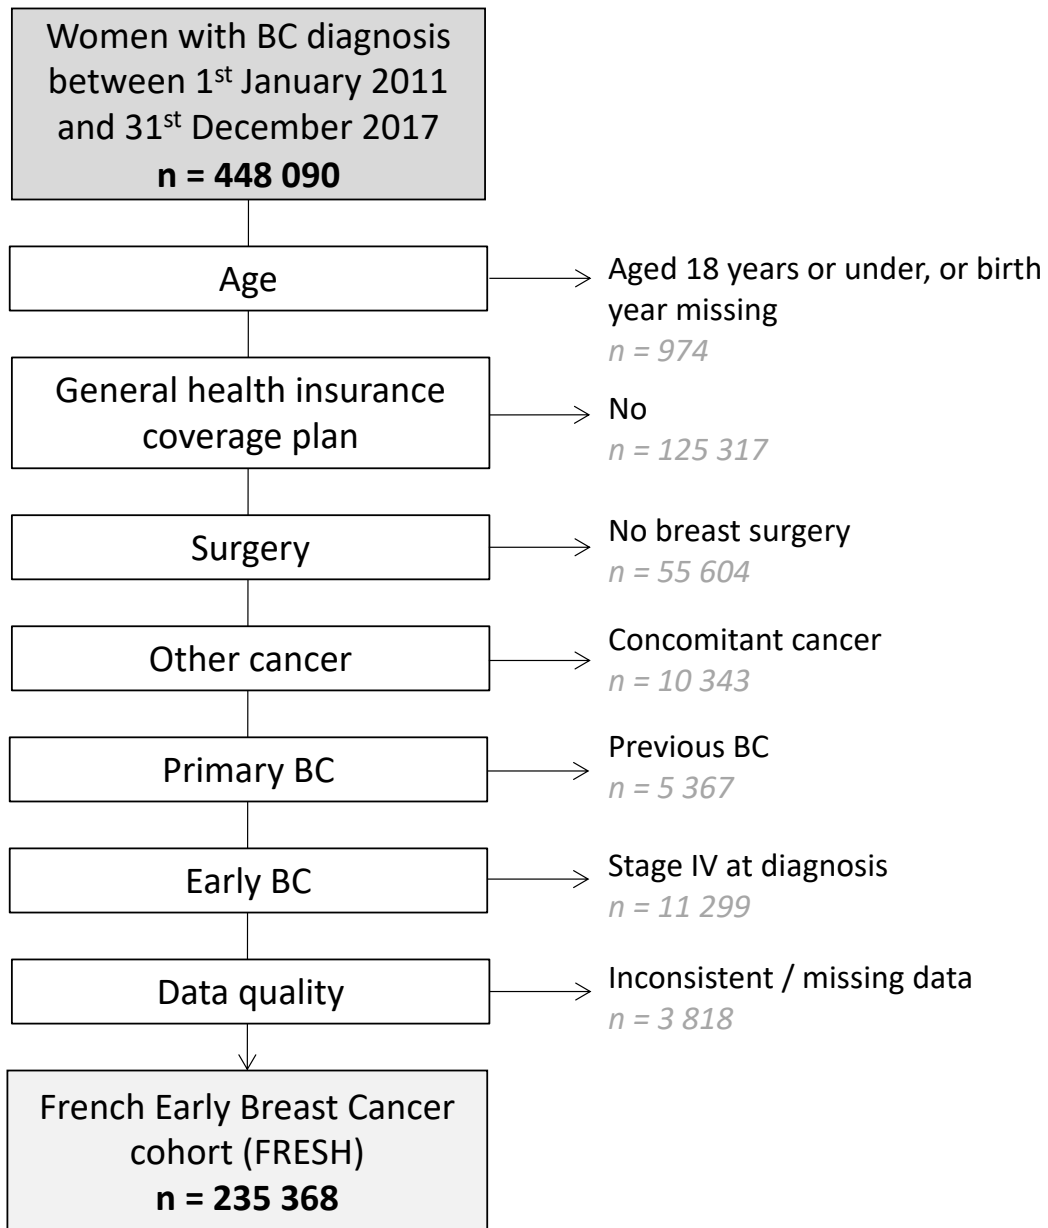

446

447 Abbreviations: BC: breast cancer.

448 Supplementary Figure 10: Modified ATC codes and ATC names for ATC class G03 (sex hormones and modulators of the genital system).

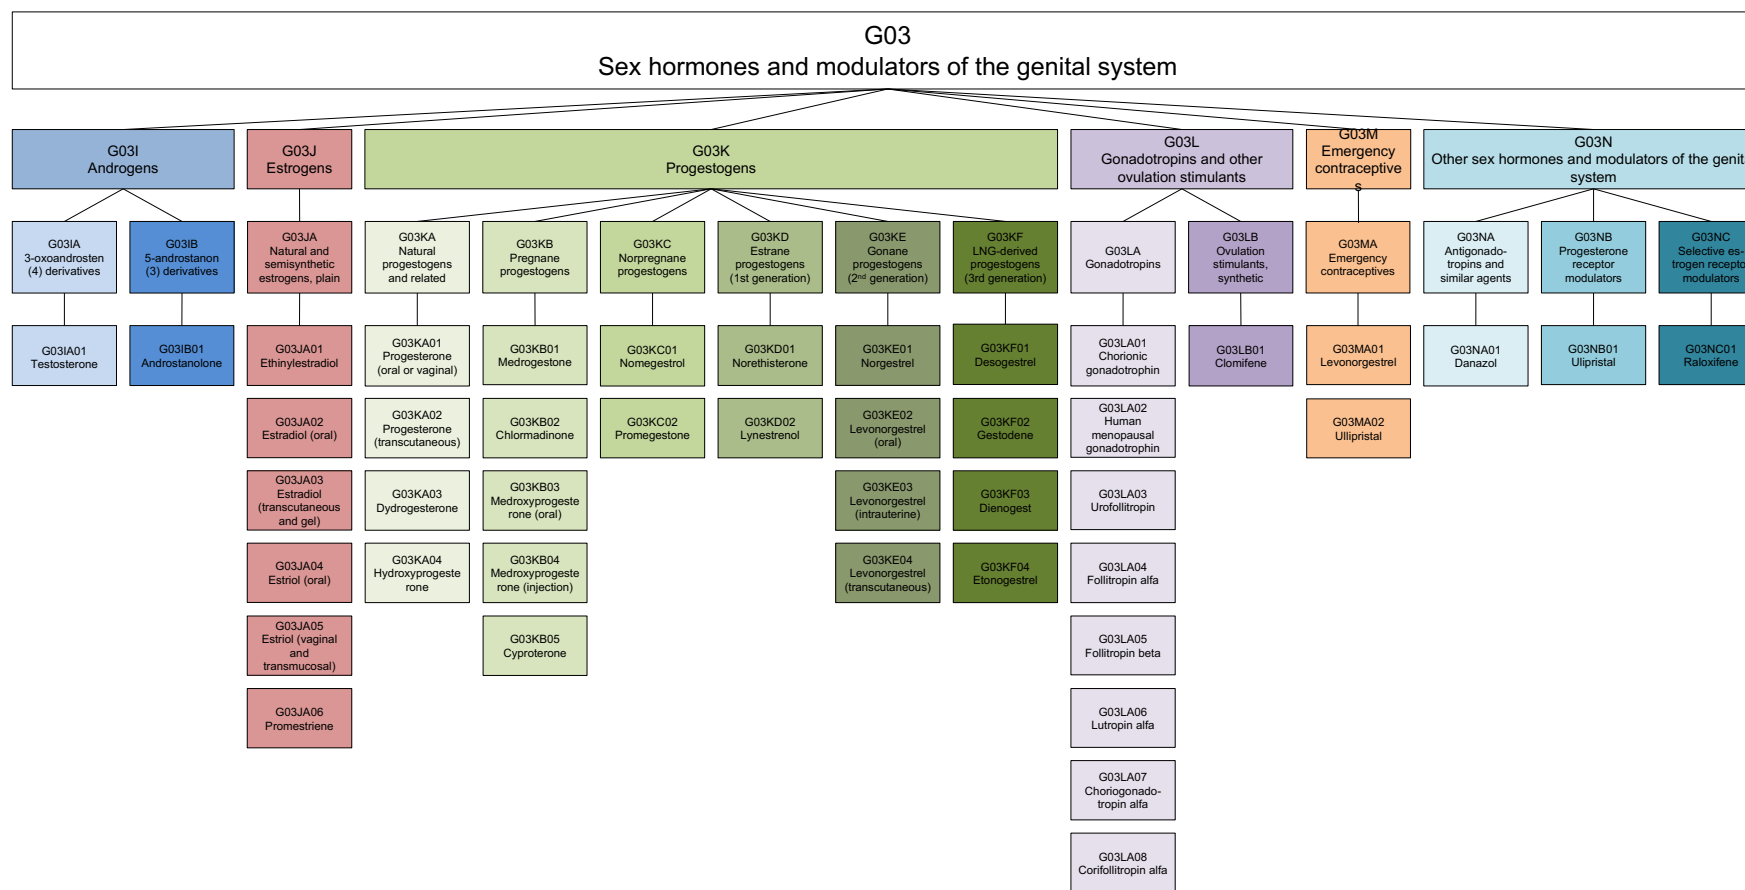

449  
 450 The first row corresponds to ATC level 2, the second row corresponds to ATC level 3, the third to ATC level 4, and the remaining rows (fourth  
 451 to eleventh rows) to ATC level 5 (medications). The basic color assigned to each medication depends on ATC level 3, with the shade of the color  
 452 thereafter depending on ATC level 4. *Abbreviations: ATC: Anatomical Therapeutic Chemical.*

453 Supplementary Figure 11: Directed acyclic graph (DAG).

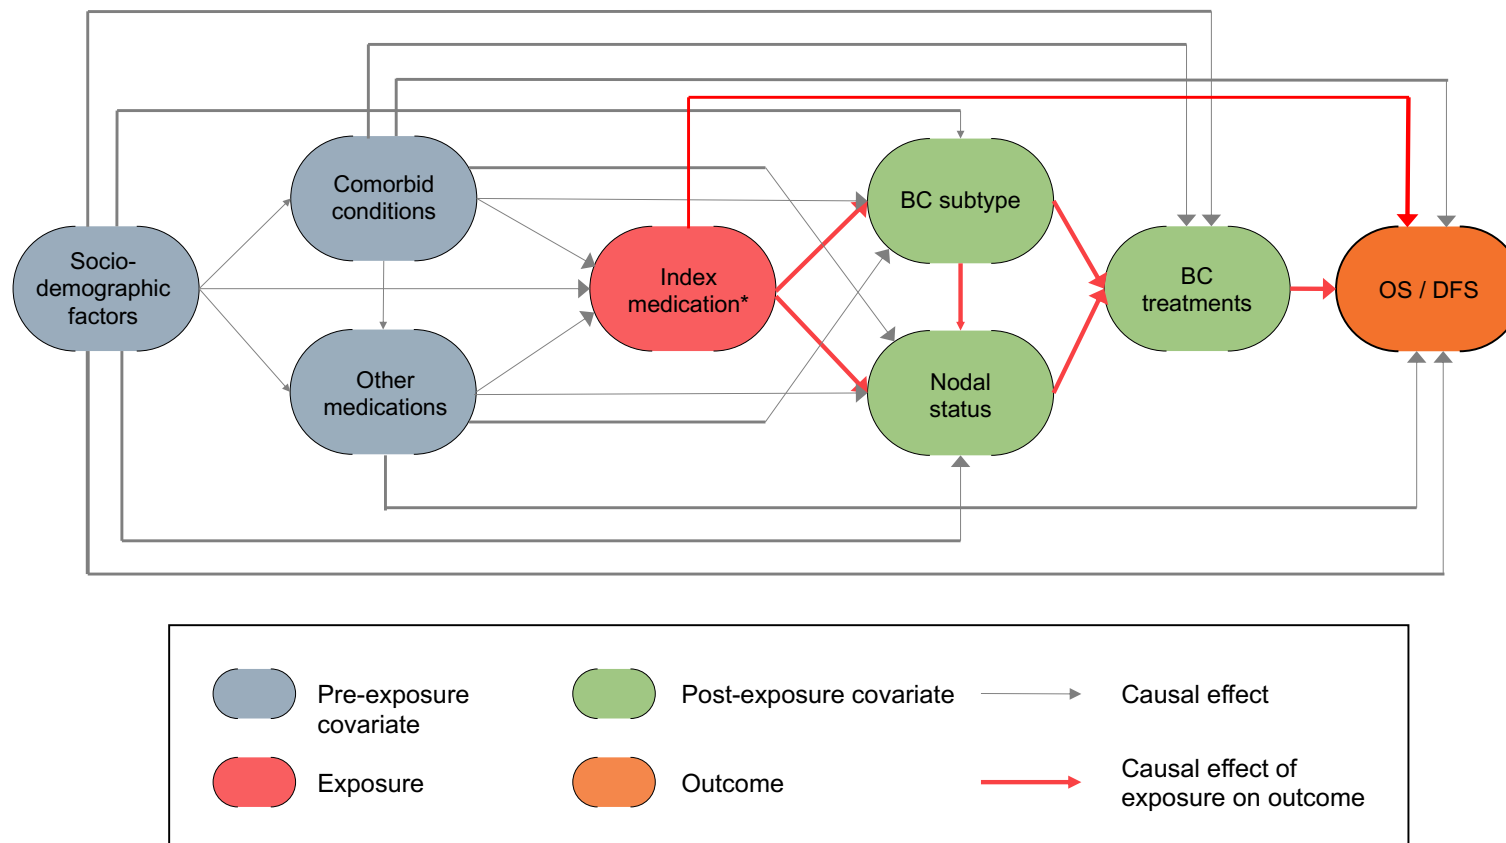

454

455 Nodes represent variables or group of variables included in the analyses. Directed edges between nodes represent causal effects. The goal of the  
456 study was to infer the average treatment effect (ATE) of each medication, or index medication (causal exposure, colored in red) on overall

457 survival and disease-free survival (causal outcomes, colored in orange). The average treatment effect (ATE) is the combination of all edges  
458 colored in red. The nodes of pre-exposure covariates are colored in blue. Pre-exposure covariates include: (1) sociodemographic factors (age,  
459 deprivation index, number of general practitioner visits and number of gynecologist visits in the year preceding breast cancer diagnosis); (2)  
460 comorbid conditions (52 diseases); and (3) comedication (concomitant use of a medication other than the index medication). Pre-exposure  
461 covariates were all considered to be potential confounders <sup>21</sup>, as they were both predictors of medication intake and independent risk factors for  
462 the outcomes. The nodes of post-exposure covariates are colored in green. Post-exposure covariates included BC subtype, nodal status and BC  
463 treatment. Exposure to the index medication may influence BC biology at diagnosis. BC subtype and nodal status were therefore considered to be  
464 potential mediators of the effect of exposure on the outcomes. Given that all pre-exposure covariates were known, we assumed that exposure to  
465 the index medication did not influence the therapeutic choices of the clinicians. We, therefore, did not consider BC treatments to be mediators of  
466 the effect of exposure on the outcomes. \* The index medication is the medication under investigation. *Abbreviations: BC: breast cancer; ATE:*  
467 *average treatment effect; ATC: Anatomical Therapeutic Chemical; OS: overall survival; DFS: disease-free survival.*

468 Supplementary Figure 12: Directed acyclic graph (DAG) for the mediation analyses.

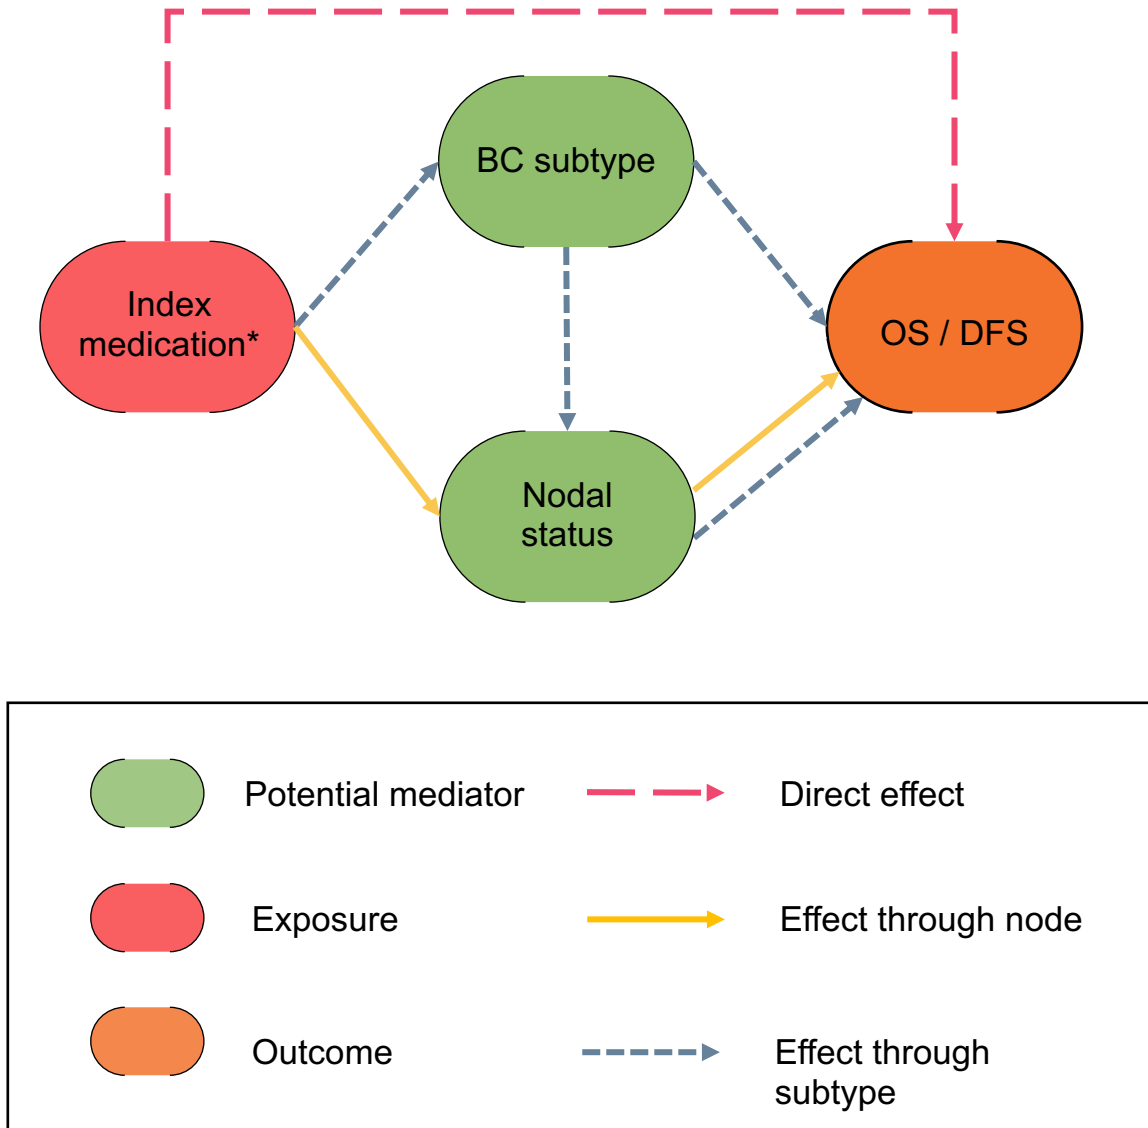

469

470 Nodes represent variables. Directed edges between nodes represent causal effects. The goal of  
 471 the mediation analysis is to break down the average treatment effect (ATE) of the index  
 472 medication (causal exposure; in red) on OS or DFS (causal outcomes, in orange) into three  
 473 path-specific effects (PSEs) according to BC subtype and nodal status (potential mediators, in  
 474 green). The arrows included in the three PSEs are color-coded as follows: (1) pink for the  
 475 direct effect; (2) yellow for the effect through node (effect through nodal status and not  
 476 through subtype); and (3) blue for the effect through subtype (effect through subtype and  
 477 potentially through nodal status). We assumed that BC subtype was an independent risk factor  
 478 for lymph node involvement, as reported elsewhere, so that there was a causal link between  
 479 BC subtype and nodal status. \* The index medication is the medication under investigation.

480 Only medications with a significant protective or deleterious ATE (hazard ratio) were selected  
481 for mediation analyses. *Abbreviations: BC: breast cancer; ATE: average treatment effect;*  
482 *ATC: Anatomical Therapeutic Chemical; OS: overall survival; DFS: disease-free survival.*

483 **Supplementary References**

- 484 1. World Health Organization. International Classification of Diseases (ICD).  
485 <https://www.who.int/standards/classifications/classification-of-diseases>.
- 486 2. Bannay, A. *et al.* The Best Use of the Charlson Comorbidity Index With Electronic  
487 Health Care Database to Predict Mortality. *Med Care* 54, 188–194 (2016).
- 488 3. Billioti de Gage, S. *et al.* Antidepressants and Hepatotoxicity: A Cohort Study among 5  
489 Million Individuals Registered in the French National Health Insurance Database. *CNS*  
490 *Drugs* 32, 673–684 (2018).
- 491 4. Bouyer, B., Rudnichi, A., Dray-Spira, R., Zureik, M. & Coste, J. Thromboembolic risk  
492 after lumbar spine surgery: a cohort study on 325 000 French patients. *J Thromb Haemost*  
493 (2018) doi:10.1111/jth.14205.
- 494 5. Coste, J. *et al.* Risk of early neurodevelopmental disorders associated with in utero  
495 exposure to valproate and other antiepileptic drugs: a nationwide cohort study in France.  
496 *Sci Rep* 10, 17362 (2020).
- 497 6. Giral, P., Neumann, A., Weill, A. & Coste, J. Cardiovascular effect of discontinuing  
498 statins for primary prevention at the age of 75 years: a nationwide population-based  
499 cohort study in France. *Eur Heart J* 40, 3516–3525 (2019).
- 500 7. Jabagi, M. J. *et al.* Risk of secondary hematologic malignancies associated with breast  
501 cancer chemotherapy and G-CSF support: A nationwide population-based cohort.  
502 *International Journal of Cancer* n/a, (2020).
- 503 8. Lemaitre, M. *et al.* Association Between Use of Thiopurines or Tumor Necrosis Factor  
504 Antagonists Alone or in Combination and Risk of Lymphoma in Patients With  
505 Inflammatory Bowel Disease. *JAMA* 318, 1679–1686 (2017).

- 506 9. Maura, G. *et al.* Oral anticoagulants and risk of acute liver injury in patients with  
507 nonvalvular atrial fibrillation: a propensity-weighted nationwide cohort study. *Scientific*  
508 *Reports* 10, 11624 (2020).
- 509 10. Sbidian, E., Mezzarobba, M., Weill, A., Coste, J. & Rudant, J. Persistence of treatment  
510 with biologics for patients with psoriasis: a real-world analysis of 16 545 biologic-naïve  
511 patients from the French National Health Insurance database (SNIIRAM). *Br J Dermatol*  
512 180, 86–93 (2019).
- 513 11. Semenzato, L. *et al.* Maladies chroniques, états de santé et risque d’hospitalisation et de  
514 décès hospitalier pour COVID-19 lors de la première vague de l’épidémie en France:  
515 Étude de cohorte de 66 millions de personnes. 41 (2021).
- 516 12. Dumas, E. *et al.* The French Early Breast Cancer Cohort (FRESH): a resource for breast  
517 cancer research and evaluations of oncology practices based on the French National  
518 Healthcare System Database (SNDS). 2022.03.14.22272286 Preprint at  
519 <https://doi.org/10.1101/2022.03.14.22272286> (2022).
- 520 13. Rey, G., Jouglà, E., Fouillet, A. & Hémon, D. Ecological association between a  
521 deprivation index and mortality in France over the period 1997 - 2001: variations with  
522 spatial scale, degree of urbanicity, age, gender and cause of death. *BMC Public Health* 9,  
523 33 (2009).
- 524 14. Austin, P. C. An Introduction to Propensity Score Methods for Reducing the Effects of  
525 Confounding in Observational Studies. *Multivariate Behav Res* 46, 399–424 (2011).
- 526 15. Austin, P. C. & Stuart, E. A. Moving towards best practice when using inverse probability  
527 of treatment weighting (IPTW) using the propensity score to estimate causal treatment  
528 effects in observational studies. *Stat Med* 34, 3661–3679 (2015).
- 529 16. Cole, S. R. & Hernán, M. A. Constructing Inverse Probability Weights for Marginal  
530 Structural Models. *Am J Epidemiol* 168, 656–664 (2008).



- 531 17. VanderWeele, T. J., Vansteelandt, S. & Robins, J. M. Effect decomposition in the  
532 presence of an exposure-induced mediator-outcome confounder. *Epidemiology* 25, 300–  
533 306 (2014).
- 534 18. Vanderweele, T. J. *Explanation in Causal Inference: Methods for Mediation and*  
535 *Interaction*. xvi, 706 (Oxford University Press, New York, NY, US, 2015).
- 536 19. Chatton, A. *et al.* G-computation, propensity score-based methods, and targeted  
537 maximum likelihood estimator for causal inference with different covariates sets: a  
538 comparative simulation study. *Sci Rep* 10, 9219 (2020).
- 539 20. Le Borgne, F., Giraudeau, B., Querard, A. H., Giral, M. & Foucher, Y. Comparisons of  
540 the performance of different statistical tests for time-to-event analysis with confounding  
541 factors: practical illustrations in kidney transplantation. *Stat Med* 35, 1103–1116 (2016).
- 542 21. Brookhart, M. A. *et al.* Variable selection for propensity score models. *Am J Epidemiol*  
543 163, 1149–1156 (2006).
- 544
