# Supplementary material for: Concomitant medication, comorbidity and survival in patients with breast cancer
Source: PubMed Central journal article supplement (PMC10997660; doi:10.1038/s41467-024-47002-3), 2024-04-05
Supplement: 41467_2024_47002_MOESM3_ESM.pdf [file 41467_2024_47002_MOESM3_ESM.pdf]

### Description of Additional Supplementary Files

**File:** Supplementary Data 1

**Description:** Number of medication users by ATC (Anatomical Therapeutic Chemical) level (1, 2, 3, 4 and 5).

**File:** Supplementary Data 2

**Description:** Estimated average treatment effect (ATE, Cox hazard ratio), along with its 95% confidence interval for overall survival (OS), and p-value for the 113 medications passing the adjustment quality test. Abbreviations: ATC: Anatomical Therapeutic Chemical; CI: confidence interval; Systemic hormonal preparations\*: systemic hormonal preparations, excluding sex hormones and insulins.

**File:** Supplementary Data 3

**Description:** Estimated average treatment effect (ATE, Cox hazard ratio), along with its 95% confidence interval for disease-free survival (DFS), and p-value for the 113 medications passing the adjustment quality test. Abbreviations: ATC: Anatomical Therapeutic Chemical; CI: confidence interval; Systemic hormonal preparations\*: systemic hormonal preparations, excluding sex hormones and insulins.

**File:** Supplementary Data 4

**Description:** List of ICD10, CCAM, LPP and NGAP codes used to identify comorbid conditions. Abbreviations: ICD10: International Classification of Diseases – 10th revision, CCAM: “Classification Communes des Actes Médicaux”, LPP: “Liste des produits et prestations”, NGAP: “Nomenclature Générale des Actes Professionnels”, LTI: long-term illness, HIV: human immunodeficiency virus, AIDS: acquired immunodeficiency syndrome; ATC: Anatomical Therapeutic Chemical.

**File:** Supplementary Data 5

**Description:** List of CCAM, ICD-10 and ATC codes used to identify breast cancer relapses. Abbreviations: ICD 10: international statistical classification and related health problems – 10th revision; CCAM: “Classification Communes des Actes Médicaux”; ATC = anatomical therapeutic and chemical classification.
